# Psychiatric Services

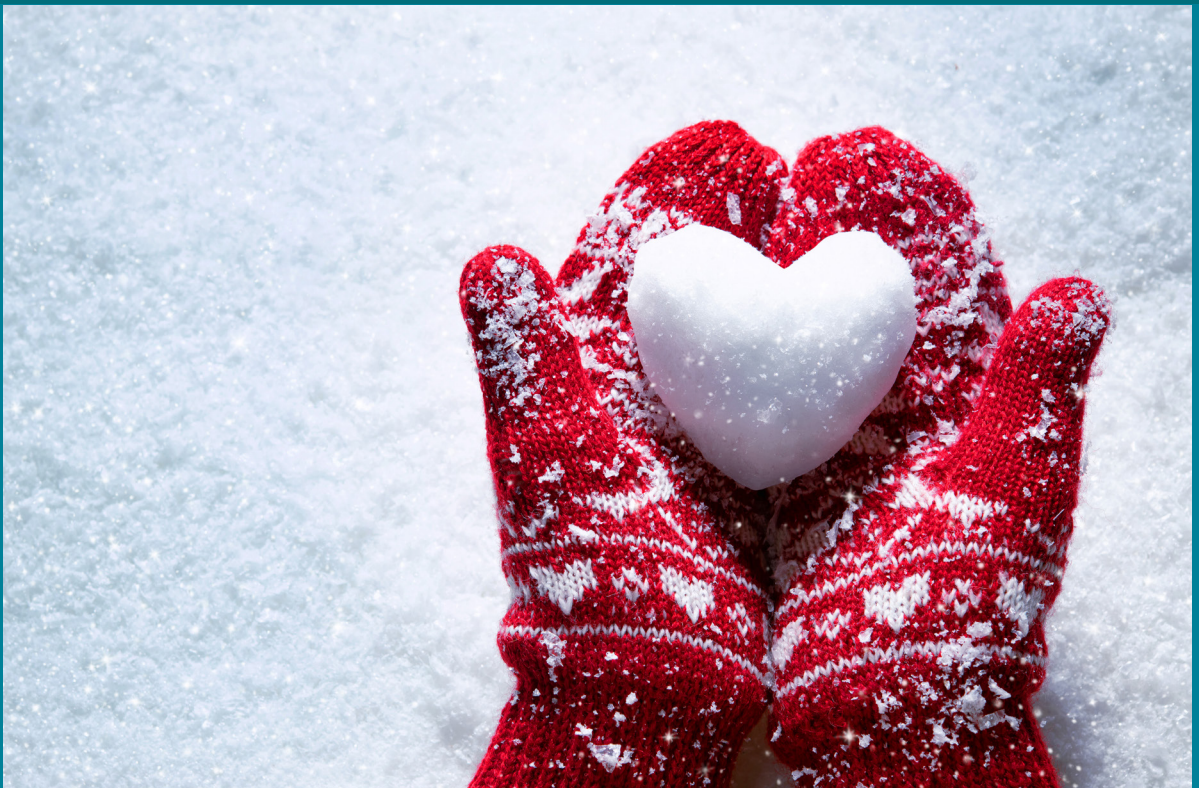

Impact of COVID-19 on behavioral health of people  
with intellectual/developmental disabilities

Viewpoint: Moving past the medication–psychosocial  
treatment dichotomy in the opioid epidemic

Care coordination between correctional and community mental health services

Advancing clozapine use in a community mental health system
